# Supplementary material for: Physicochemical properties, phenolic content andin vitrodigestion profile of Chinese black rice (Oryza sativaL.)
Source: Royal Society of Chemistry journal article supplement (doi:10.1039/d3fo03199c), 2023-01-01
Supplement: d3fo03199c1.pdf [file d3fo03199c1.pdf]

## Supplementary material

Figure S1 Light micrographs (bright (left) and polarized (right)) pictures of black rice starches (A), XRD diffractograms (B) (A-F represented the samples of black rice flours with different milling degree, G represented black rice bran; H represented black rice starch).

A

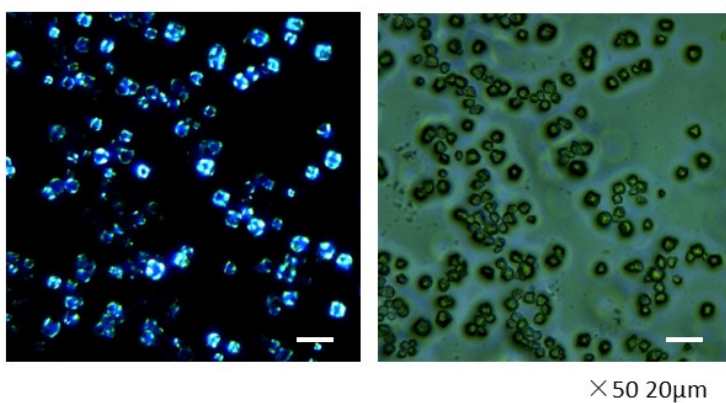

B

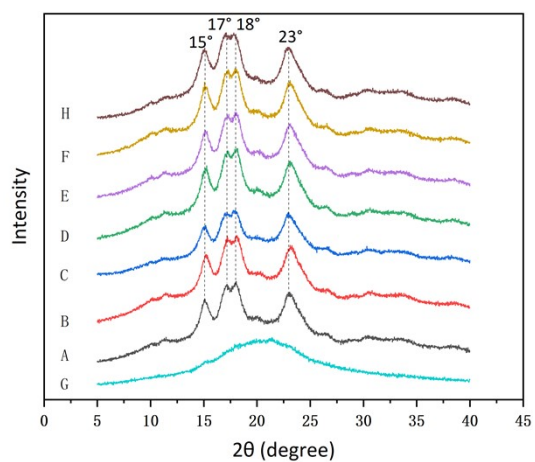

Figure S2 Scanning electron microscopy (SEM) pictures (A(1-4)-F(1-4)) and light micrographs (A5 and F5) of black rice samples. Surface section: A1-F1 (scale bar: 500  $\mu\text{m}$ ) and A2-F2 (scale bar: 20  $\mu\text{m}$ ), transverse section: A3-F3 (scale bar: 500  $\mu\text{m}$ ) and A4-F4 (scale bar: 20  $\mu\text{m}$ ); A5 and F5 (scale bar: 100  $\mu\text{m}$ ). Abbreviations: P, AL and EN, indicated pericarp layer, aleurone layer and endosperm region of black rice grains, respectively.

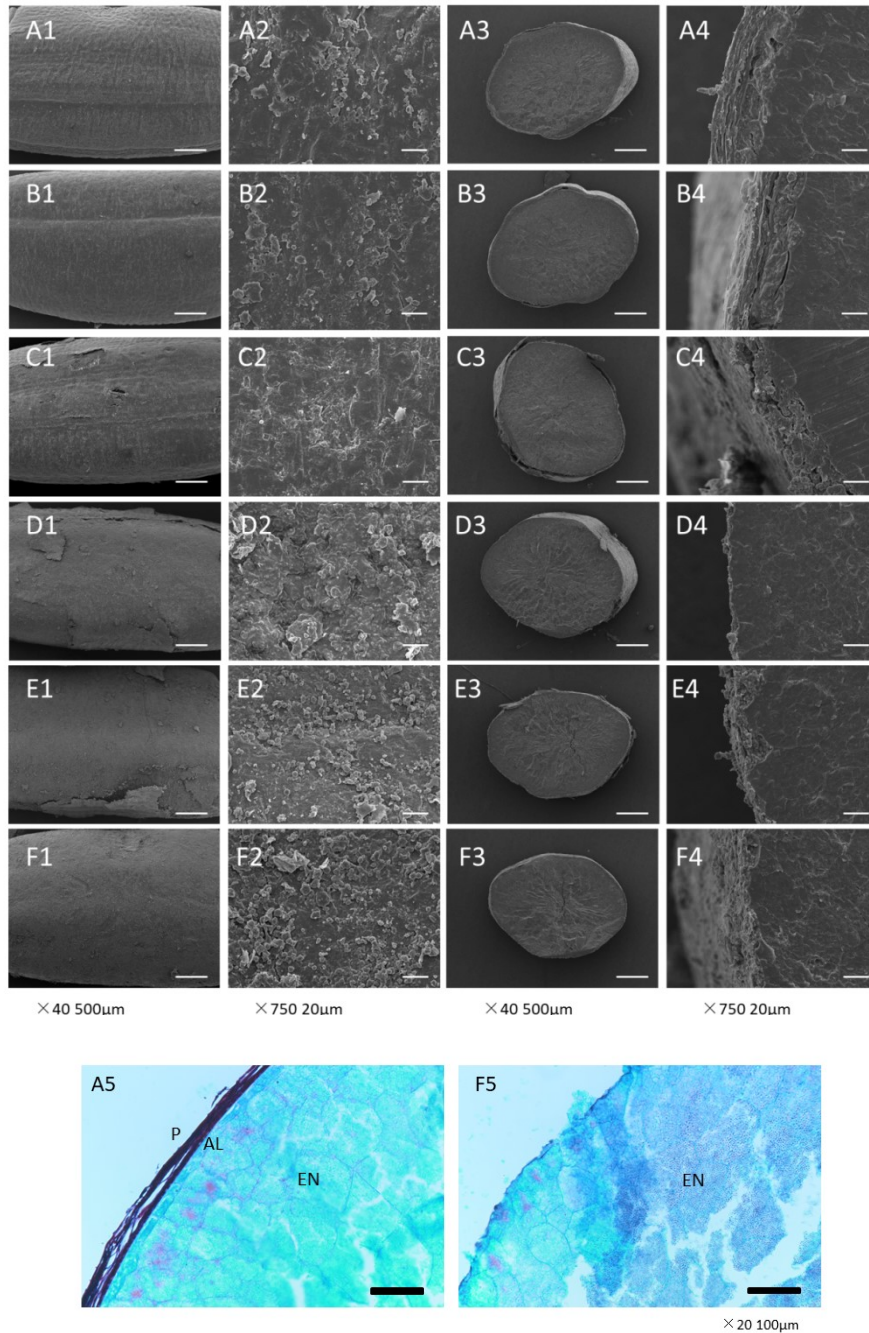

Figure S3 Starch hydrolysis curves of black rice flour (A-F) during *in vitro* digestion at 37 °C.

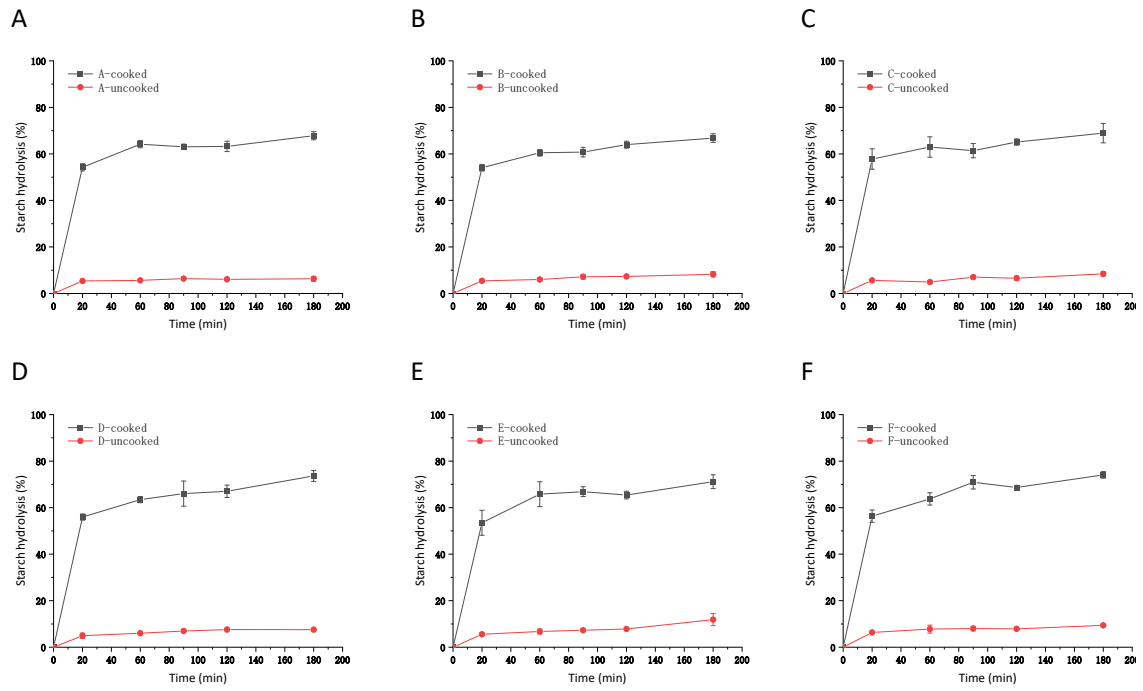

Table S1 Milling degree, bran yield, head rice yield and rice flour moisture of black rice samples.

| Rice Sample | Milling Degree (%) | Bran Yield (%) | Yield Head Rice (%) | Hundred Grain Weight (g) | Length breadth Ratio (L:B) | Rice Flour Moisture (%) |
|-------------|--------------------|----------------|---------------------|--------------------------|----------------------------|-------------------------|
| A           | 0.00±0.00f         | 0.00±0.00f     | 95.87±0.35a         | 1.91±0.05a               | 2.79±0.24a                 | 8.70±0.24ab             |
| B           | 0.57±0.02e         | 0.50±0.03e     | 87.48±0.24ab        | 1.92±0.02a               | 2.68±0.22a                 | 8.79±0.28ab             |
| C           | 1.27±0.02d         | 1.14±0.03d     | 79.10±7.57bc        | 1.91±0.04a               | 2.82±0.38a                 | 9.20±0.34ab             |
| D           | 4.16±0.04c         | 3.78±0.04c     | 76.66±3.67bc        | 1.83±0.02ab              | 2.65±0.17a                 | 8.52±0.60b              |
| E           | 6.97±0.14b         | 6.78±0.17b     | 69.76±4.53c         | 1.76±0.07b               | 2.63±0.22a                 | 8.92±0.04ab             |
| F           | 10.19±0.10a        | 9.88±0.14a     | 68.87±3.86c         | 1.75±0.01b               | 2.97±0.31a                 | 9.46±0.16a              |

Different letters in the columns represent statistically significant differences ( $p < 0.05$ ).

Table S2 Proximate composition of black rice samples with different milling degree (g/100g DW).

| Sample | Protein (N×5.95) | Lipids      | Ash         | Amylose     | Carbohydrate <sup>a</sup> |
|--------|------------------|-------------|-------------|-------------|---------------------------|
| A      | 9.95±0.21a       | 2.48±0.05a  | 1.44±0.14a  | 1.08±0.12b  | 86.13                     |
| B      | 10.22±0.10a      | 2.38±0.12a  | 1.21±0.03ab | 1.00±0.04b  | 86.19                     |
| C      | 10.19±0.15a      | 1.92±0.19ab | 1.18±0.02bc | 0.95±0.17b  | 86.71                     |
| D      | 9.85±0.23a       | 1.57±0.14bc | 0.98±0.09cd | 1.23±0.54ab | 87.60                     |
| E      | 10.07±0.11a      | 1.24±0.28c  | 0.86±0.11d  | 1.88±0.96ab | 87.83                     |
| F      | 9.88±0.10a       | 0.67±0.23d  | 0.51±0.06e  | 2.55±0.52a  | 88.94                     |

<sup>a</sup>Carbohydrate=100-protein-fat-ash

Different letters in the columns represent statistically significant differences ( $p < 0.05$ ).

Table S3 Variation of color values of intact black rice grains, rice flour and bran.

| <b>Intact Rice</b> | <b>L*</b>    | <b>a*</b>  | <b>b*</b>    | <b>W</b>     | <b>ΔE*</b>  |
|--------------------|--------------|------------|--------------|--------------|-------------|
| A                  | 45.71±1.75c  | 0.58±0.07c | -0.93±0.19bc | 45.70±1.76c  | -           |
| B                  | 46.55±0.90bc | 0.65±0.11c | -1.16±0.17c  | 46.53±0.90bc | 1.05±0.59c  |
| C                  | 45.15±0.73c  | 1.16±0.16c | -1.13±0.12c  | 45.12±0.73c  | 0.99±0.38c  |
| D                  | 47.59±1.75bc | 1.96±0.54b | -1.06±0.36c  | 47.54±1.77bc | 2.73±0.67bc |
| E                  | 51.25±3.40ab | 2.31±0.24b | -0.35±0.35b  | 51.19±3.39ab | 5.91±3.22b  |
| F                  | 55.99±2.23a  | 4.60±0.31a | 0.45±0.24a   | 55.75±2.20a  | 11.14±2.17a |
| <b>Rice Flour</b>  | <b>L*</b>    | <b>a*</b>  | <b>b*</b>    | <b>W</b>     | <b>ΔE*</b>  |
| A                  | 64.26±0.78d  | 3.56±0.07d | 0.73±0.12bc  | 64.08±0.78d  | -           |
| B                  | 65.23±0.65cd | 3.58±0.05d | 0.57±0.05cd  | 65.04±0.64cd | 1.00±0.61d  |
| C                  | 65.17±1.07cd | 4.01±0.12c | 0.38±0.10de  | 64.94±1.07cd | 1.21±0.82d  |
| D                  | 66.75±0.46c  | 4.70±0.10a | 0.25±0.05e   | 66.42±0.47c  | 2.78±0.38d  |
| E                  | 72.50±1.08b  | 4.01±0.03c | 0.88±0.10ab  | 72.19±1.07b  | 8.25±1.08c  |
| F                  | 77.77±0.77a  | 4.38±0.20b | 1.04±0.03a   | 77.32±0.77a  | 13.54±0.77b |
| G (Rice Bran)      | 43.44±0.10e  | 2.54±0.12e | 0.85±0.12ab  | 43.37±0.10e  | 20.85±0.11a |

Different letters in the columns represent statistically significant differences ( $p < 0.05$ ).

Table S4 Pasting properties of black rice starch (H) and rice flours (A-F) with different milling degree.

| Samples | PV/cp         | HS/cp         | FV/cp         | BD/cp        | SB/cp        | PT/°C        |
|---------|---------------|---------------|---------------|--------------|--------------|--------------|
| A       | 186.33±3.21e  | 183.00±2.65e  | 250.33±1.53e  | 3.33±0.58d   | 77.33±1.15e  | 79.21±0.49a  |
| B       | 218.00±7.21de | 214.00±6.56d  | 306.33±9.61d  | 4.00±1.00d   | 92.33±3.05d  | 78.65±0.00ab |
| C       | 249.50±0.71d  | 245.00±0.00d  | 341.00±0.00d  | 4.50±0.71d   | 96.00±0.00d  | 78.65±0.00ab |
| D       | 351.50±2.12c  | 333.00±2.83c  | 446.00±1.41c  | 18.50±0.71c  | 113.00±1.41c | 78.30±0.49ab |
| E       | 455.00±24.04b | 418.50±21.92b | 544.00±25.46b | 36.50±2.12b  | 125.50±3.54b | 77.55±0.57b  |
| F       | 760.00±22.63a | 626.50±16.26a | 778.50±21.92a | 133.50±6.36a | 152.00±5.65a | 77.95±0.00ab |
| H       | 2385.00±52.33 | 1815.50±0.71  | 1998.50±28.99 | 569.50±51.62 | 183.00±29.70 | 75.98±0.67c  |

Since each viscosity of black rice starch (H) was much higher than that of rice flour samples, the significance analysis was between black rice flour samples (A-F). Different letters in the columns represent statistically significant differences ( $p < 0.05$ ).

Table S5 Gelatinization and retrogradation characteristics of black rice starch (H) and rice flours with different milling degree (A-F).

| Gelatinization characteristics |              |              |              |             |              |
|--------------------------------|--------------|--------------|--------------|-------------|--------------|
| Samples                        | To(°C)       | Tp(°C)       | Tc(°C)       | ΔH(J/g)     |              |
| A                              | 74.47±0.38a  | 79.63±0.15a  | 85.50±0.17a  | 8.25±0.13b  |              |
| B                              | 73.95±0.21ab | 79.15±0.35ab | 84.60±0.85ab | 7.25±0.07b  |              |
| C                              | 74.05±0.35ab | 79.35±0.91ab | 85.20±0.85a  | 8.29±0.35b  |              |
| D                              | 73.98±0.84ab | 78.80±0.51ab | 84.58±0.52ab | 7.02±0.97b  |              |
| E                              | 73.30±0.57ab | 78.05±0.92b  | 83.50±1.13bc | 7.47±0.21b  |              |
| F                              | 72.97±0.38b  | 77.80±0.87b  | 84.10±0.80ab | 7.50±0.12b  |              |
| H                              | 70.33±0.31c  | 75.60±0.00c  | 82.03±0.50c  | 11.92±1.64a |              |
| Retrogradation characteristics |              |              |              |             |              |
| Samples                        | To(°C)       | Tp(°C)       | Tc(°C)       | ΔHr(J/g)    | RD(%)        |
| A                              | 44.27±0.31a  | 53.03±0.49a  | 63.23±0.31a  | 4.05±0.15a  | 49.08±1.97a  |
| B                              | 44.60±0.28a  | 54.05±0.78a  | 63.15±0.49a  | 3.78±0.51a  | 52.14±7.49a  |
| C                              | 44.75±0.35a  | 53.55±0.49a  | 63.85±0.35a  | 3.90±0.70a  | 47.26±10.52a |
| D                              | 44.83±1.08a  | 54.20±1.11a  | 63.02±0.39a  | 3.53±0.64a  | 54.70±11.21a |
| E                              | 45.20±0.53a  | 54.01±0.87a  | 63.15±0.45a  | 3.24±0.78a  | 54.61±6.96a  |
| F                              | 45.70±0.00a  | 53.87±0.40a  | 62.90±0.40a  | 3.66±0.80a  | 48.64±10.26a |
| H                              | 44.93±0.42a  | 54.53±0.59a  | 63.10±0.26a  | 4.74±0.67a  | 40.74±10.98a |

Different letters in the columns represent statistically significant differences ( $p < 0.05$ ).

Table S6 Identification results of polyphenols in whole black rice

| No. | Rt (min) | Mw (Da)  | Q1 (Da) | Q3 (Da) | Compounds                                                 |
|-----|----------|----------|---------|---------|-----------------------------------------------------------|
| 1   | 3.45     | 287.24   | 287     | 213     | Cyanidin                                                  |
| 2   | 3.86     | 301.1    | 301.1   | 286     | Peonidin                                                  |
| 3   | 2.9      | 303.24   | 303     | 229     | Delphinidin                                               |
| 4   | 2.58     | 433.1    | 433.1   | 271     | Pelargonidin 3-O-beta-D-glucoside (Callistephin chloride) |
| 5   | 2.45     | 449.1    | 449.1   | 287.3   | Cyanidin 3-O-glucoside (Kuromanin)                        |
| 6   | 3        | 463.123  | 463.1   | 301     | Peonidin O-hexoside                                       |
| 7   | 2.3      | 465.1    | 465.1   | 303     | Delphinidin 3-O-glucoside (Mirtillin)                     |
| 8   | 3.22     | 477.1    | 477.1   | 315     | Rosinidin O-hexoside                                      |
| 9   | 2.42     | 479      | 479     | 317     | Petunidin 3-O-glucoside                                   |
| 10  | 2.81     | 493      | 493     | 331     | Malvidin 3-O-galactoside                                  |
| 11  | 2.86     | 493.2    | 493.2   | 331     | Malvidin 3-O-glucoside (Oenin)                            |
| 12  | 2.81     | 535.1    | 535.1   | 287.5   | Cyanidin 3-O-malonylhexoside                              |
| 13  | 2.6      | 595      | 595     | 287     | Cyanidin 3-O-rutinoside (Keracyanin)                      |
| 14  | 2.45     | 595      | 595     | 270.9   | Pelargonin                                                |
| 15  | 3.17     | 290.3    | 291     | 139     | L-Epicatechin                                             |
| 16  | 2.81     | 290.079  | 291.1   | 139     | Catechin                                                  |
| 17  | 2.39     | 610.2    | 611.2   | 287.1   | Gallocatechin-gallocatechin                               |
| 18  | 2.5      | 322.1    | 323.1   | 177.4   | O-Feruloyl coumarin                                       |
| 19  | 3.06     | 338.1    | 339.1   | 145.4   | O-Feruloyl 2-hydroxylcoumarin                             |
| 20  | 3.74     | 338.1    | 339.1   | 177.2   | O-Feruloyl 4-hydroxylcoumarin                             |
| 21  | 3.76     | 368.1    | 369.1   | 207.1   | N-sinapoyl hydroxycoumarin                                |
| 22  | 4.87     | 256.074  | 257     | 137     | Liquiritigenin                                            |
| 23  | 5.41     | 272.0685 | 273.1   | 153     | Naringenin                                                |
| 24  | 5.3      | 272.069  | 273.1   | 153     | Naringenin chalcone                                       |
| 25  | 3.29     | 274.084  | 275     | 139     | Afzelechin (3,5,7,4'-Tetrahydroxyflavan)                  |
| 26  | 4.85     | 288.063  | 289.1   | 153     | Eriodictyol                                               |
| 27  | 4.05     | 434.1213 | 435.1   | 273     | Naringenin 7-O-glucoside (Prunin)                         |
| 28  | 4.09     | 610.19   | 611.2   | 303     | Hesperetin 7-O-neohesperidoside (Neohesperidin)           |
| 29  | 5.45     | 272.069  | 273.1   | 153     | Butin                                                     |
| 30  | 4.38     | 302.043  | 303     | 257     | Tricetin                                                  |
| 31  | 7.32     | 372.121  | 373.1   | 343     | Tangeretin                                                |
| 32  | 6.84     | 402.132  | 403.1   | 373     | Nobiletin                                                 |
| 33  | 4.67     | 416.2    | 417.2   | 255.1   | Chrysin O-hexoside                                        |
| 34  | 4.05     | 432.1    | 433.1   | 271.1   | Apigenin 7-O-glucoside (Cosmosiin)                        |
| 35  | 3.73     | 432.1056 | 433.1   | 271     | Apigenin 5-O-glucoside                                    |
| 36  | 3.7      | 448.101  | 449.1   | 287.2   | Luteolin 7-O-glucoside (Cynaroside)                       |
| 37  | 3.96     | 462.1    | 463.1   | 301     | Chrysoeriol 5-O-hexoside                                  |



|    |      |          |       |       |                                             |
|----|------|----------|-------|-------|---------------------------------------------|
| 38 | 4.14 | 462.2    | 463.2 | 301.1 | Chrysoeriol 7-O-hexoside                    |
| 39 | 4.12 | 476.1    | 477.1 | 301.5 | Chrysoeriol O-glucuronic acid               |
| 40 | 4.82 | 476.1    | 477.1 | 331.1 | Tricin O-rhamnoside                         |
| 41 | 5.17 | 476.1    | 477.1 | 315   | O-methylChrysoeriol 5-O-hexoside            |
| 42 | 5.28 | 476.2    | 477.2 | 315   | O-methylChrysoeriol 7-O-hexoside            |
| 43 | 4.13 | 492.1    | 493.1 | 331   | Tricin 7-O-hexoside                         |
| 44 | 5.24 | 502      | 503   | 255   | Chrysin O-malonylhexoside                   |
| 45 | 4.36 | 518      | 519   | 271   | Apigenin O-malonylhexoside                  |
| 46 | 4.43 | 548.1    | 549.1 | 301.4 | Chrysoeriol O-malonylhexoside               |
| 47 | 4.55 | 550      | 551   | 303.1 | Tricetin O-malonylhexoside                  |
| 48 | 4.16 | 564.3    | 565.3 | 331   | Tricin O-oxalylhexoside                     |
| 49 | 3.89 | 578.1636 | 579.2 | 271   | Apigenin 7-O-neohesperidoside (Rhoifolin)   |
| 50 | 3.82 | 578.1636 | 579.2 | 271   | Apigenin 7-rutinoside (Isorhoifolin)        |
| 51 | 3.6  | 580.2    | 581.2 | 383.2 | Luteolin O-hexosyl-O-pentoside              |
| 52 | 3.93 | 608.4    | 609.4 | 301   | Chrysoeriol 7-O-rutinoside                  |
| 53 | 3.38 | 610.1    | 611.1 | 449.3 | Luteolin 3',7-di-O-glucoside                |
| 54 | 4.23 | 640.1    | 641.1 | 479.1 | Selgin O-hexosyl-O-hexoside                 |
| 55 | 4.49 | 654      | 655   | 207   | Luteolin O-sinapoylhexoside                 |
| 56 | 3.35 | 654.2    | 655.2 | 331.2 | Tricin 7-O-hexosyl-O-hexoside               |
| 57 | 4.75 | 668      | 669   | 207   | Chrysoeriol O-sinapoylhexoside              |
| 58 | 4.71 | 698.2    | 699.2 | 331.1 | Tricin O-sinapoylhexoside                   |
| 59 | 4.38 | 724.2    | 725.2 | 331.1 | Tricin O-rhamnosyl-O-malonylhexoside        |
| 60 | 3.88 | 432.1    | 433.1 | 283.1 | Apigenin C-glucoside                        |
| 61 | 3.47 | 448.1    | 449.1 | 299.1 | Luteolin 6-C-glucoside                      |
| 62 | 3.32 | 448.1    | 449.1 | 299.2 | Luteolin C-hexoside                         |
| 63 | 3.3  | 450.1    | 451.1 | 331.1 | Eriodictyol C-hexoside                      |
| 64 | 3.74 | 462.1    | 463.1 | 313.2 | Chrysoeriol 8-C-hexoside                    |
| 65 | 4.06 | 476.1    | 477.1 | 297.2 | O-methylChrysoeriol 8-C-hexoside            |
| 66 | 3.45 | 564.1    | 565.1 | 433.3 | C-hexosyl-apigenin O-pentoside              |
| 67 | 3.14 | 580.1    | 581.1 | 431.3 | 6-C-hexosyl luteolin O-pentoside            |
| 68 | 3.02 | 580.1    | 581.1 | 515.4 | C-hexosyl-luteolin C-pentoside              |
| 69 | 3.54 | 594.1    | 595.1 | 463.1 | di-C,C-hexosyl-apigenin                     |
| 70 | 3.6  | 608.1    | 609.1 | 463.3 | Chrysoeriol C-hexosyl-O-rhamnoside          |
| 71 | 2.9  | 610.1    | 611.1 | 431.3 | 6-C-hexosyl-luteolin O-hexoside             |
| 72 | 3.64 | 610.1    | 611.1 | 317.1 | 8-C-hexosyl-luteolin O-hexoside             |
| 73 | 2.8  | 610.2    | 611.2 | 473.1 | C-hexosyl-luteolin O-hexoside               |
| 74 | 3.27 | 610.2    | 611.2 | 473.1 | di-C,C-hexosyl-luteolin                     |
| 75 | 3.67 | 610.2    | 611.2 | 465.1 | Luteolin 8-C-hexosyl-O-hexoside             |
| 76 | 3.31 | 624      | 625   | 463   | 8-C-hexosyl chrysoeriol O-hexoside          |
| 77 | 2.77 | 640.1    | 641.1 | 622.8 | C-hexosyl-isorhamnetin O-hexoside           |
| 78 | 2.5  | 756.1    | 757.1 | 577.2 | Apigenin 6-C-hexosyl-8-C-hexosyl-O-hexoside |

|     |      |          |       |       |                                              |
|-----|------|----------|-------|-------|----------------------------------------------|
| 79  | 2.47 | 772.1    | 773.1 | 593   | Luteolin 6-C-hexoside 8-C-hexosyl-O-hexoside |
| 80  | 3.96 | 300.1    | 301.1 | 286   | Kaempferide                                  |
| 81  | 4.92 | 302.043  | 303   | 153   | Quercetin                                    |
| 82  | 3.94 | 304.058  | 305.1 | 231   | Dihydroquercetin (Taxifolin)                 |
| 83  | 7.16 | 314.079  | 315.1 | 300   | Kumatakenin                                  |
| 84  | 4.39 | 318.038  | 319   | 153   | Myricetin                                    |
| 85  | 6.44 | 330.074  | 331   | 316   | 3,7-Di-O-methylquercetin                     |
| 86  | 4.29 | 432.106  | 433   | 287   | Kaempferol 3-O-rhamnoside (Kaempferin)       |
| 87  | 3.86 | 448.101  | 449   | 287   | Kaempferol 3-O-galactoside (Trifolin)        |
| 88  | 3.68 | 464.096  | 465   | 303   | Quercetin 3-O-glucoside (Isotrifoliin)       |
| 89  | 4.04 | 464.096  | 465   | 303   | Quercetin 4'-O-glucoside (Spiraeoside)       |
| 90  | 3.84 | 478      | 479   | 317.1 | methylQuercetin O-hexoside                   |
| 91  | 4.25 | 478.2    | 479.2 | 317.2 | Isorhamnetin O-hexoside                      |
| 92  | 3.27 | 508.1    | 509.1 | 347.2 | Syringetin 3-O-hexoside                      |
| 93  | 3.7  | 594.159  | 595.2 | 287   | Kaempferol 3-O-robinobioside (Biorobin)      |
| 94  | 3.77 | 594.1585 | 595.2 | 287   | Kaempferol 3-O-rutinoside (Nicotiflorin)     |
| 95  | 3.73 | 610.2    | 611.2 | 303.1 | Quercetin 7-O-rutinoside                     |
| 96  | 4.33 | 556.2    | 557.2 | 331   | Tricin 4'-O-(syringyl glyceryl)ether         |
| 97  | 4.01 | 194.0579 | 195.1 | 117   | 3-Hydroxy-4-methoxycinnamic acid             |
| 98  | 3.92 | 194.0579 | 195.1 | 117   | Ferulic acid                                 |
| 99  | 2.7  | 670.2    | 671.2 | 509   | Gallic acid O-feruloyl-O-hexosyl-O-hexoside  |
| 100 | 5.01 | 284.069  | 285   | 270   | Calycosin                                    |
| 101 | 4.89 | 284.069  | 285   | 270   | Glycitein                                    |
| 102 | 3.84 | 432.106  | 433   | 271   | Genistein 7-O-Glucoside (Genistin)           |
